# Supplementary material for: VERTAF/Multi-Core: A SysML-Based Application Framework for Multi-Core Embedded Software Development
Source: Springer Nature journal article supplement (doi:10.1007/s11390-011-1146-3), 2011-05-01
Supplement: 11390_2011_1146_MOESM1_ESM.pdf [file 11390_2011_1146_MOESM1_ESM.pdf]

## VERTAF/Multi-Core (VMC) :以 SysML 为基础之多核心嵌入式软件开发环境应用框架

近几年来多核心架构已成为市场发展趋势主流,从个人电影、服务器到嵌入式系统等皆引进多核心系统提高系统运算效能以达到应用质量之需求。然而在多核心系统上执行之应用本身也需要进行平行化设计,才能有效的发挥多核心系统的效能。为使系统开发者能快速开发其平行化应用,已有许多公司或学术团队开发平行函式库辅助应用软件设计者开发多核心软件,唯应用软件设计者仍需对于平行函式库具有相当程度之了解,因此本团队针对多核心软件开发环境设计一应用框架,支持应用软件设计者以塑模(Model)的方式进行多核心软件设计并自动生成平行程序代码以减少系统设计及多核心程序代码撰写的差距。

VERTAF/Multi-Core (VMC) 作为一针对多核心嵌入式架构之整合性软件开发环境,应用软件设计者可透过本环境以 SysML 描述其系统需求,以 UML 标准符号塑模其系统设计,并将该设计套用样式结构自动转换为更高质量的设计,透过优良的设计模型自动产生程序代码,最后并可对程序代码加以测试。因此,本系统具下列优点:(1)支持多核架构嵌入式软件之设计与验证;(2)提供一个整合性的开发环境;(3)因本环境乃基于 UML 标准所建构,所以易与目前既有之 UML 开发工具整合;(4)支持既有之多核架构开发函式库,如:OpenMP 以及 Intel Threading Building Blocks。

VMC 包含五项主要功能:功能一,以 SysML 为基础支持多核心嵌入式系统需求塑模环境。功能二,支持多核心嵌入式软件设计之多重观点整合模型与可再用组件库。功能三,支持多核心嵌入式软件设计之设计模式系统。功能四,提供多核心嵌入式软件之合成与程序代码生成。功能五多核心嵌入式软件设计之测试支持系统。

建构于上述七项功能,本篇论文之贡献主要有五项:

1. 为平行算法(pipeline)设计一平行塑模的方法,并以自动化多核心程序代码支持平行程序代码之生成。
2. 提出一套方法有效解决塑模阶段 run-to-completion (RTC) semantics 与底层程序代码生成方法相互抵触的问题。
3. 我们也为多核心系统环境分析了各种不同的线程所能支持的功能及其限制。
4. 我们也提出一套程序代码生成的方法,整合系统行为程序代码生成及应用平行化程序代码生成,使应用软件设计者无需太多基础就能撰写有效的多核心程序代码。
5. 我们采用 DVR system 做为 VMC 应用框架的应用对象,并分析生成之多核心程序代码之效能及功耗。

未来研究方面,本团队将针对系统设计阶段之测试结果进行设计分析并回馈分析结果给设计者改进其设计之参考信息,减少开发者 try-and-error 的次数。
